# Supplementary material for: The role of Leptospira spp. in horses affected with recurrent uveitis in the UK
Source: PubMed Central journal article supplement (PMC5655720; doi:10.1111/evj.12683), 2017-04-24
Supplement: EVJ-49-706-s001.pdf [file EVJ-49-706-s001.pdf]

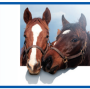

**Supplementary Item 1:** Horse signalment, serum and aqueous humour antibody titres (using a microscopic agglutination test) and calculated C-values (where applicable) from uveitis affected eyes (n = 30).

y = years; m = months; x = cross, L = left, R = right, - = no antibodies detected to serovars no antibodies detected to serovars *canicola*, *copenhageni*, *ballum*, *icterohaemorrhagiae*, *pomona*, *mozdok*, *tarassovi*, *grippotyphosa*, *australis*, *bratislava*, *autumnalis*, *hebdomadis*, *mini*, *sejroe*, *javanica*, *bataviae*, *zanoni* and *hardjo*. Samples were considered positive when agglutination was obtained at dilution of 1:100.

| Eye | Age | Breed    | Eye | Serum titre | Aqueous titre | C value | Serovar(s)involved             | Type of ERU case |
|-----|-----|----------|-----|-------------|---------------|---------|--------------------------------|------------------|
| 1   | 11y | Welsh x  | L   | -           | -             |         |                                | insidious        |
| 2   | 8y  | Cob x    | L   | 1/400       | 1/1600        | 4       | <i>hardjo</i>                  | classic          |
| 3   | 11y | Welsh    | L   | -           | -             |         |                                | classic          |
| 4   | 11y | Welsh    | R   | -           | -             |         |                                | classic          |
| 5   | 14y | WB       | R   | 1/100       | 1/100         | 1       | <i>grippotyphosa</i>           | insidious        |
| 6   | 14y |          | L   | 1/400       | -             |         | <i>bratislava</i>              | classic          |
| 7   | 12y | Arab     | R   | -           | -             |         |                                | classic          |
| 8   | 9m  | Friesian | R   | -           | -             |         |                                | classic          |
| 9   | 11y | TB       | R   | -           | -             |         |                                | classic          |
| 10  | 11y | WB       | R   | 1/400       | -             |         | <i>bratislava</i>              | classic          |
| 11  | 16y | Welsh x  | L   | 1/400       | -             |         | <i>copenhageni</i>             | classic          |
| 12  | 17y |          | L   | 1/100       | -             |         | <i>bratislava / autumnalis</i> | classic          |
| 13  | 4y  | Cob      | R   | 1/800       | 1/1600        | 2       | <i>australis</i>               | classic          |

|    |     |              |   |       |         |    |                                |           |
|----|-----|--------------|---|-------|---------|----|--------------------------------|-----------|
| 14 | 15y | TB           | L | 1/100 | -       |    | <i>hardjo / sejroe</i>         | classic   |
| 15 | 6y  | Cob          | R | -     | -       |    |                                | classic   |
| 16 | 16y | TB x         | R | 1/200 | -       |    | <i>bratislava</i>              | insidious |
| 17 | 13  | TB           | R | 1/200 | 1/12800 | 64 | <i>javanica</i>                | classic   |
| 18 | 11y | TB           | R | 1/100 | -       |    | <i>copenhageni</i>             | classic   |
| 19 | 13y | TB x         | L | 1/100 | -       |    | <i>zanoni</i>                  | classic   |
| 20 | 18y | TB x         | L | -     | -       |    |                                | classic   |
| 21 | 11y | Cob          | L | 1/800 | -       |    | <i>copenhageni / australis</i> | classic   |
| 22 | 7y  | KWPN         | R | 1/200 | -       |    |                                | posterior |
| 23 | 5y  | Lusitano     | R | 1/200 | 1/800   | 4  | <i>hebdomadis</i>              | classic   |
| 24 | 14y | TB x         | L | -     | -       |    |                                | classic   |
| 25 | 16y | Fell Pony    | R | 1/200 | -       |    | <i>autumnalis</i>              | insidious |
| 26 | 12y | Welsh x      | R | 1/200 | -       |    | <i>bratislava</i>              | classic   |
| 27 | 12y | Cob          | L | -     | -       |    |                                | classic   |
| 28 | 18y | Irish Sports | L | 1/800 | -       |    | <i>australis / bratislava</i>  | classic   |
| 29 | 5y  | Welsh D      | L | 1/100 | 1/1600  | 16 | <i>hardjo</i>                  | classic   |
| 30 | 2y  | Cob          | L | -     | -       |    |                                | classic   |
