# Supplementary material for: The role of Leptospira spp. in horses affected with recurrent uveitis in the UK
Source: PubMed Central journal article supplement (PMC5655720; doi:10.1111/evj.12683), 2017-04-24
Supplement: EVJ-49-706-s002.pdf [file EVJ-49-706-s002.pdf]

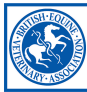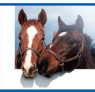

**Supplementary Item 2:** Horse signalment, serum and aqueous humour antibody titres (using a microscopic agglutination test) and calculated C-values (where applicable) from control eyes (n = 43).

y = years; x = cross, L = left, R = right, - = no antibodies detected to serovars no antibodies detected to serovars *canicola*, *copenhageni*, *ballum*, *icterohaemorrhagiae*, *pomona*, *mozdok*, *tarassovi*, *grippotyphosa*, *australis*, *bratislava*, *autumnalis*, *hebdomadis*, *mini*, *sejroe*, *javanica*, *bataviae*, *zanoni* and *hardjo*. Samples were considered positive when agglutination was obtained at dilution of 1:100.

| Eye | Age | Breed     | Eye | Serum titre | Aqueous titre | C value | Serovar(s) involved                   |
|-----|-----|-----------|-----|-------------|---------------|---------|---------------------------------------|
| 1   |     | TB x      | R   | 1/100       | -             |         | <i>bratislava</i> / <i>autumnalis</i> |
| 2   | 1y  |           | L   | 1/100       | -             |         | <i>bratislava</i>                     |
| 3   | 9y  | Welsh x   | L   | -           | -             |         |                                       |
| 4   | 14y | TB x      | R   | 1/100       | -             |         | <i>copenhageni</i>                    |
| 5   | 11y | Welsh x   | L   | -           | -             |         |                                       |
| 6   | 14y | TB x      | R   | 1/400       | -             |         | <i>canicola</i>                       |
| 7   | 5y  | Pony      | L   | 1/200       | -             |         | <i>bataviae</i>                       |
| 8   | 15y | TB x      | R   | 1/200       | -             |         | <i>autumnalis</i>                     |
| 9   | 14y | WB x      | R   | -           | -             |         |                                       |
| 10  | 17y | Welsh x   | R   | 1/200       | -             |         | <i>bratislava</i>                     |
| 11  | 17y | Irish Dr. | R   | 1/200       | -             |         | <i>autumnalis</i>                     |
| 12  | 15y | WB        | R   | 1/800       | -             |         | <i>bratislava</i> / <i>autumnalis</i> |
| 13  | 5y  | Andalu.   | L   | 1/400       | -             |         | <i>bratislava</i>                     |
| 14  | 4y  | Irish Sp. | R   | -           | -             |         |                                       |
| 15  | 11y | Irish Sp. | R   | -           | -             |         |                                       |
| 16  | 6y  | Appalo.   | R   | -           | -             |         |                                       |
| 17  | 5y  | Cob       | R   | -           | -             |         |                                       |
| 18  | 10y | TBx       | R   | -           | -             |         |                                       |
| 19  | 12y | TB        | L   | -           | -             |         |                                       |
| 20  | 11y | Cob       | R   | -           | -             |         |                                       |
| 21  | 15y | Welsh x   | L   | -           | -             |         |                                       |
| 22  | 10y | TB x      | R   | 1/100       | -             |         | <i>copenhageni</i>                    |
| 23  | 15y | Cob       | R   | -           | -             |         |                                       |

|    |     |              |   |        |   |  |                               |
|----|-----|--------------|---|--------|---|--|-------------------------------|
| 24 | 12y | Cob          | L | -      | - |  |                               |
| 25 | 14y | TB           | L | -      | - |  |                               |
| 26 | 11y | WB           | R | -      | - |  |                               |
| 27 | 12y | Welsh x      | L | -      | - |  |                               |
| 28 | 15y | Welsh x      | R | -      | - |  |                               |
| 29 | 16y | TB           | L | -      | - |  |                               |
| 30 | 11y | TB x         | L | -      | - |  |                               |
| 31 | 15y | Cob          | L | 1/800  | - |  | <i>australis</i>              |
| 32 | 25y | Cob          | L | -      | - |  |                               |
| 33 | 16y | Conn x       | L | -      | - |  |                               |
| 34 | 18y | Camarg       | L | 1/200  | - |  | <i>grippotyphosa</i>          |
| 35 | 14y | Friesian     | L | 1/200  | - |  | <i>canicola</i>               |
| 36 | 7y  | Irish Sports | R | -      |   |  |                               |
| 37 | 4y  | WB           | L | -      | - |  |                               |
| 38 | 16y | Pony         | R | 1/200  | - |  | <i>canicola</i>               |
| 39 | 6y  | Irish Sports | L | 1/200  | - |  | <i>australis / bratislava</i> |
| 40 | 10y | Welsh D      | L | 1/1600 | - |  | <i>bratislava</i>             |
| 41 | 3y  | TB           | R | -      | - |  |                               |
| 42 | 13y | Irish Sports | R | 1/200  | - |  | <i>bratislava</i>             |
| 43 | 4y  | Welsh x      | L | -      | - |  |                               |
